# Supplementary material for: 5-Fluorouracil as a Tumor-Treating Field-Sensitizer in Colon Cancer Therapy
Source: MDPI journal article supplement (doi:10.3390/cancers11121999), 2019-12-12

**Fig.4b**

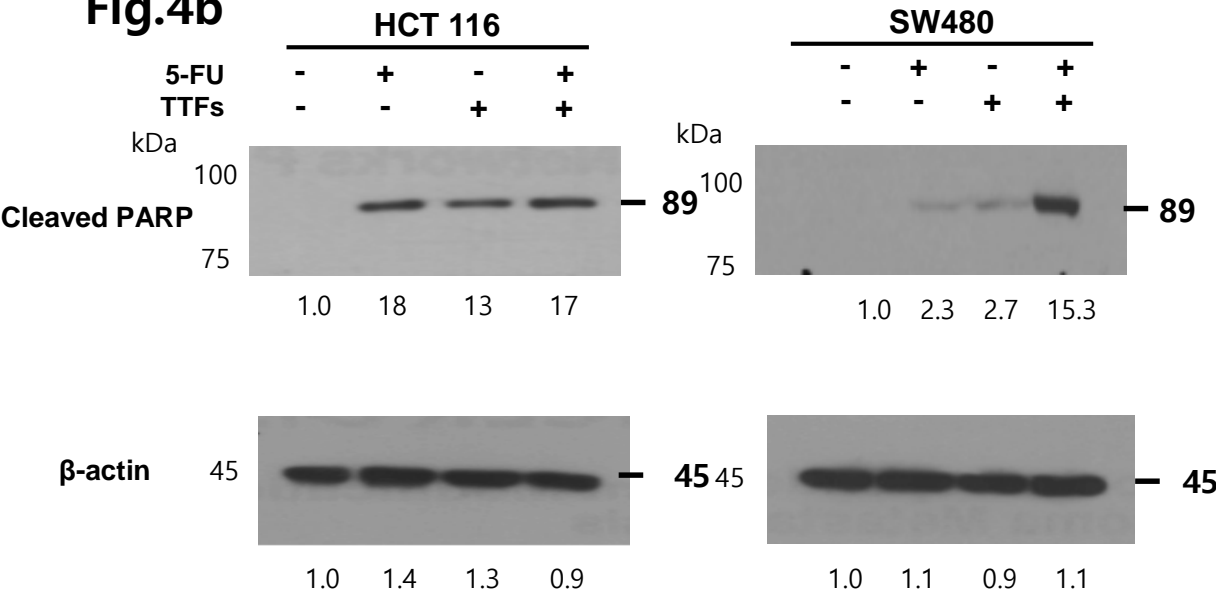

**Fig.6a**

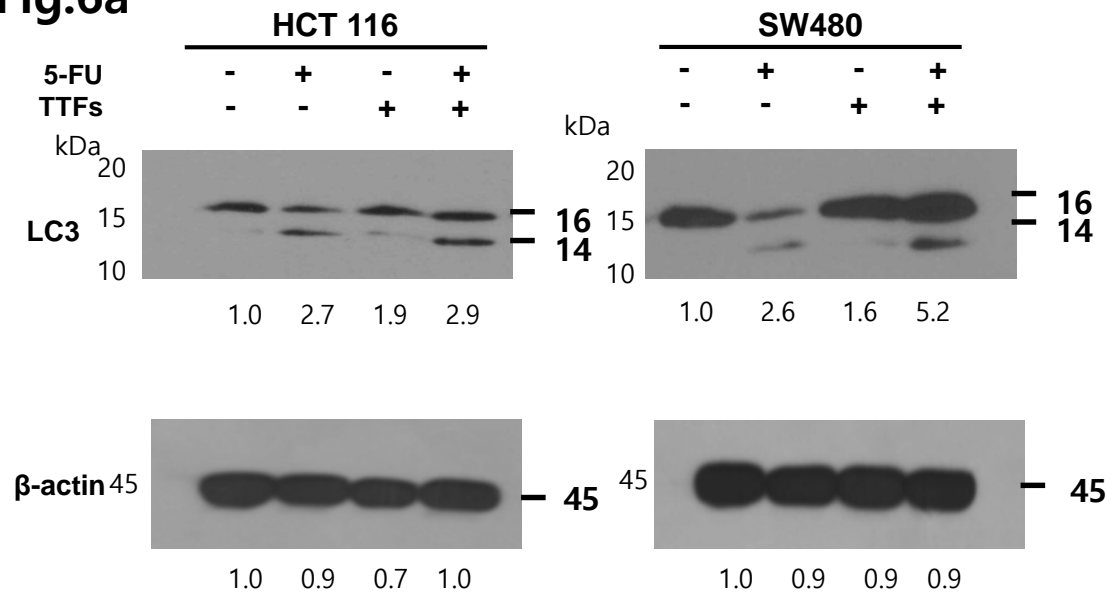

Cleaved PARP (89kDa)

HCT 116

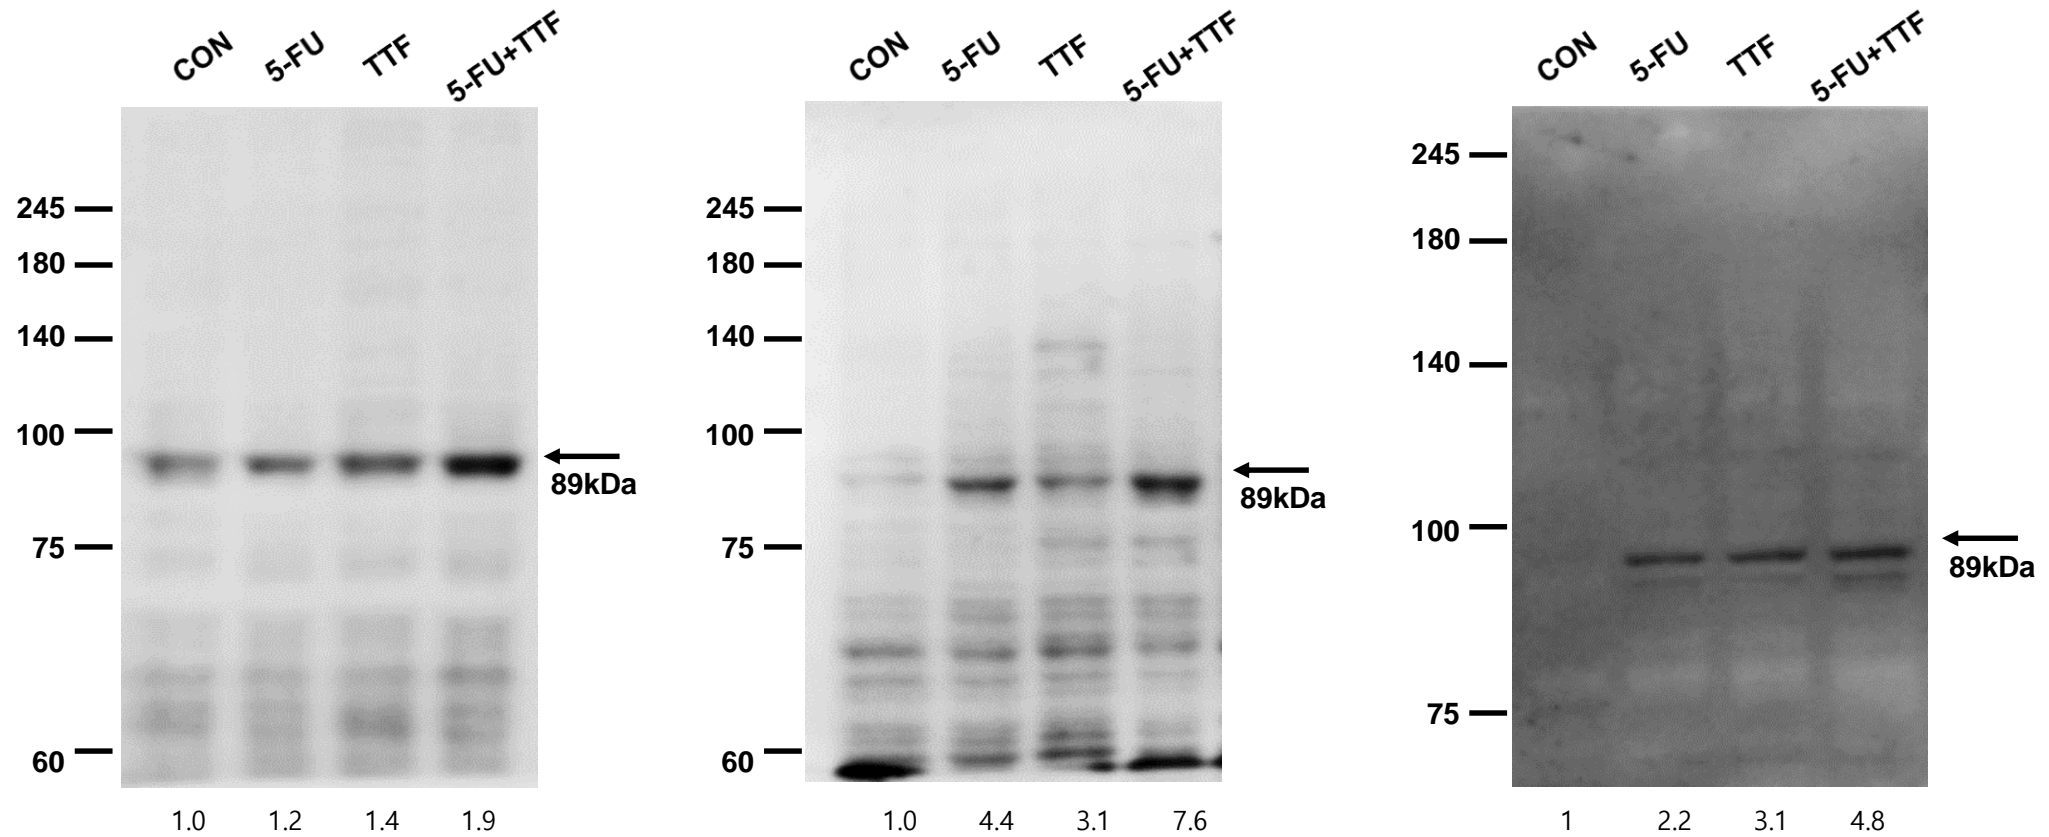

# $\beta$ - actin (45kDa)

HCT 116

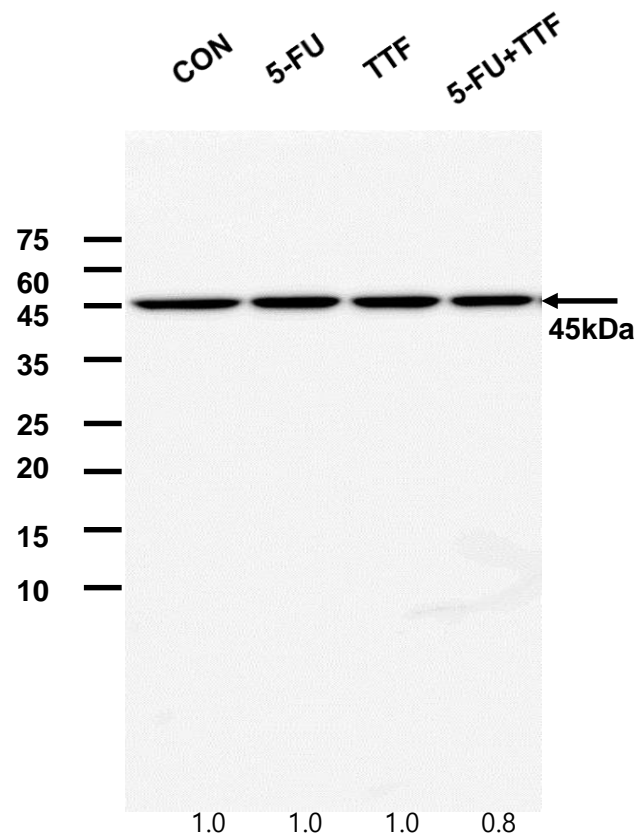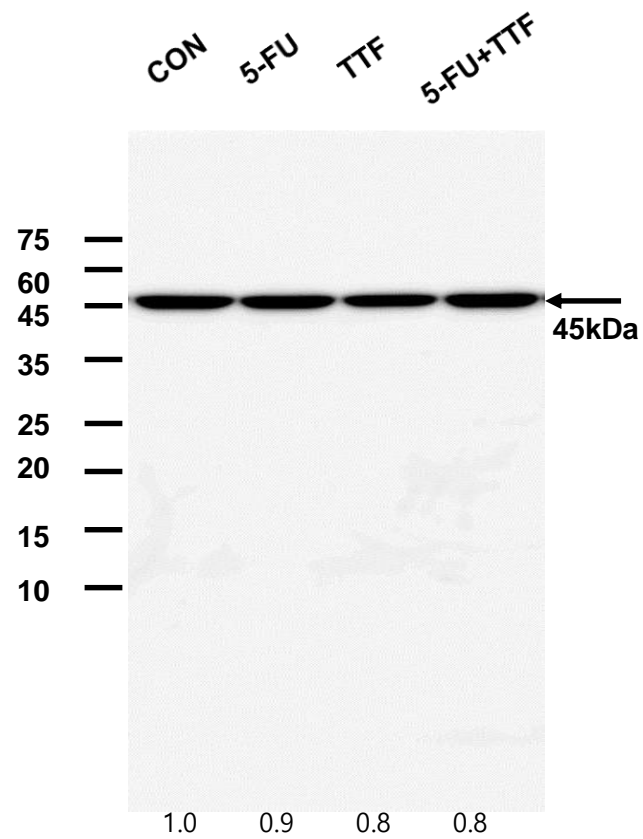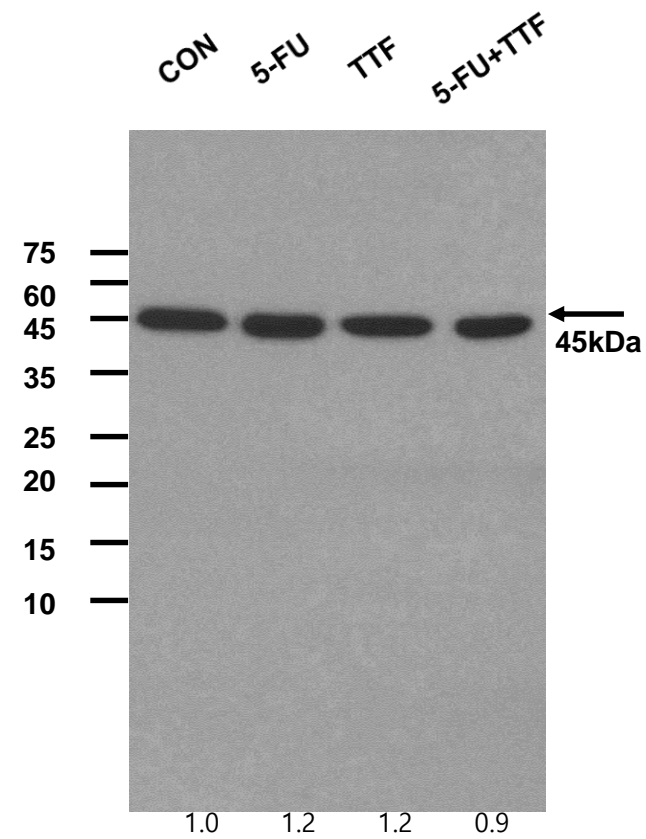

Cleaved PARP (89kDa)

SW480

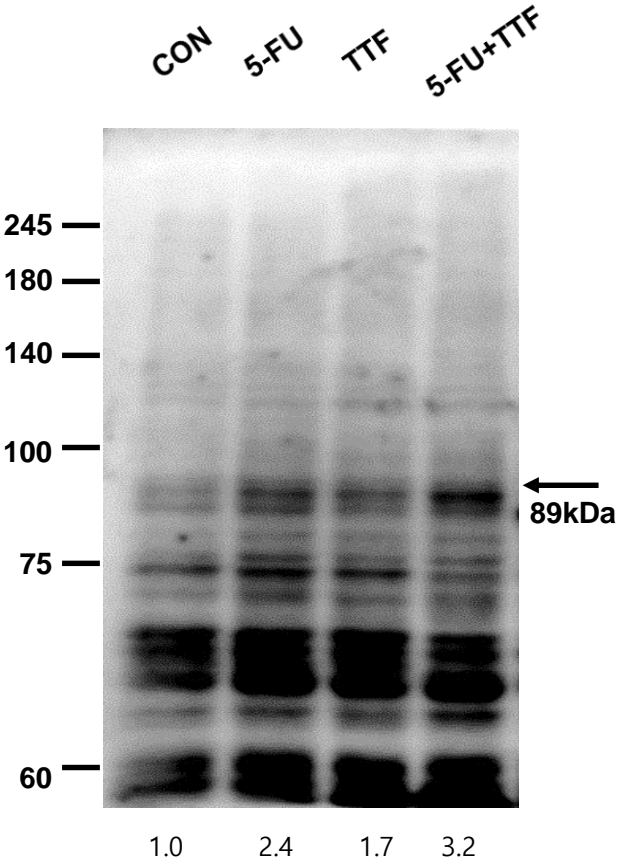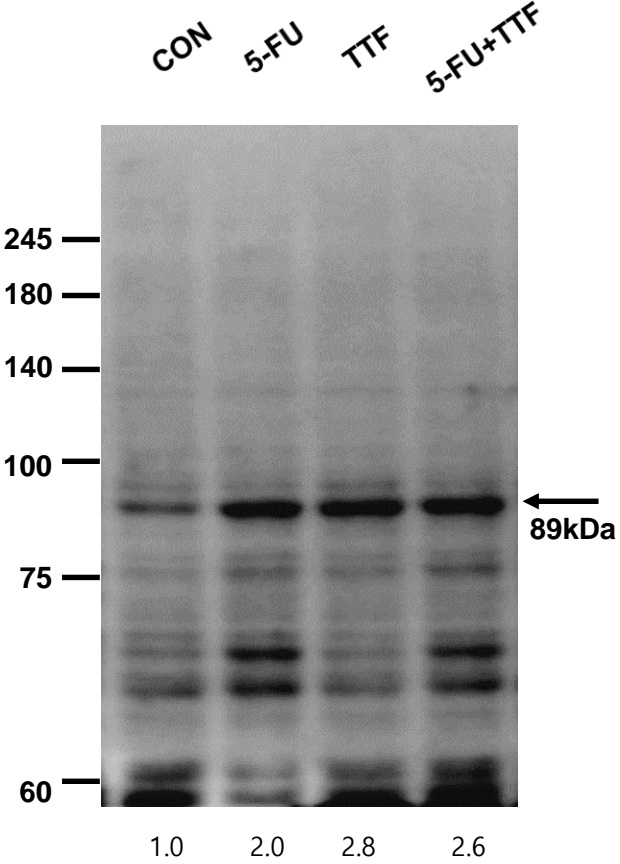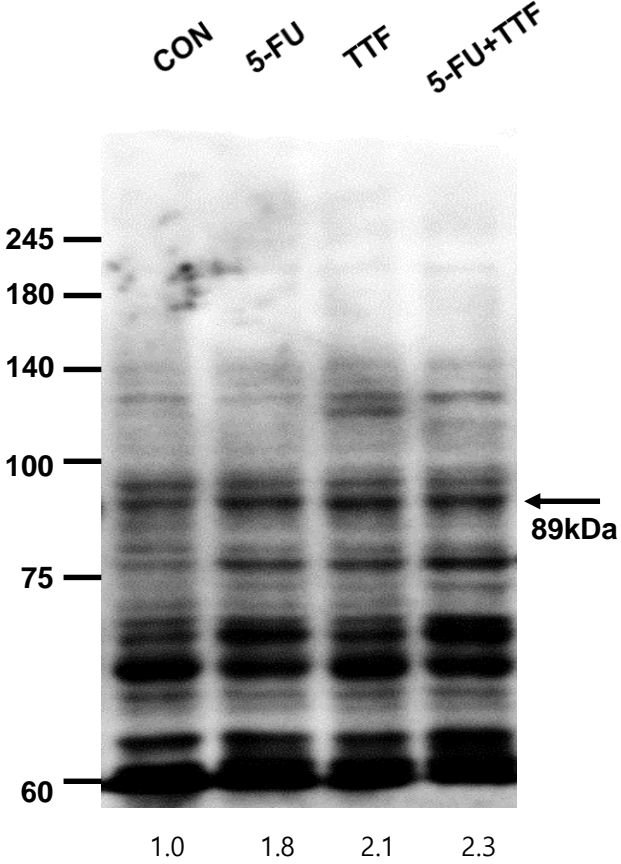

β- actin (45kDa)

SW480

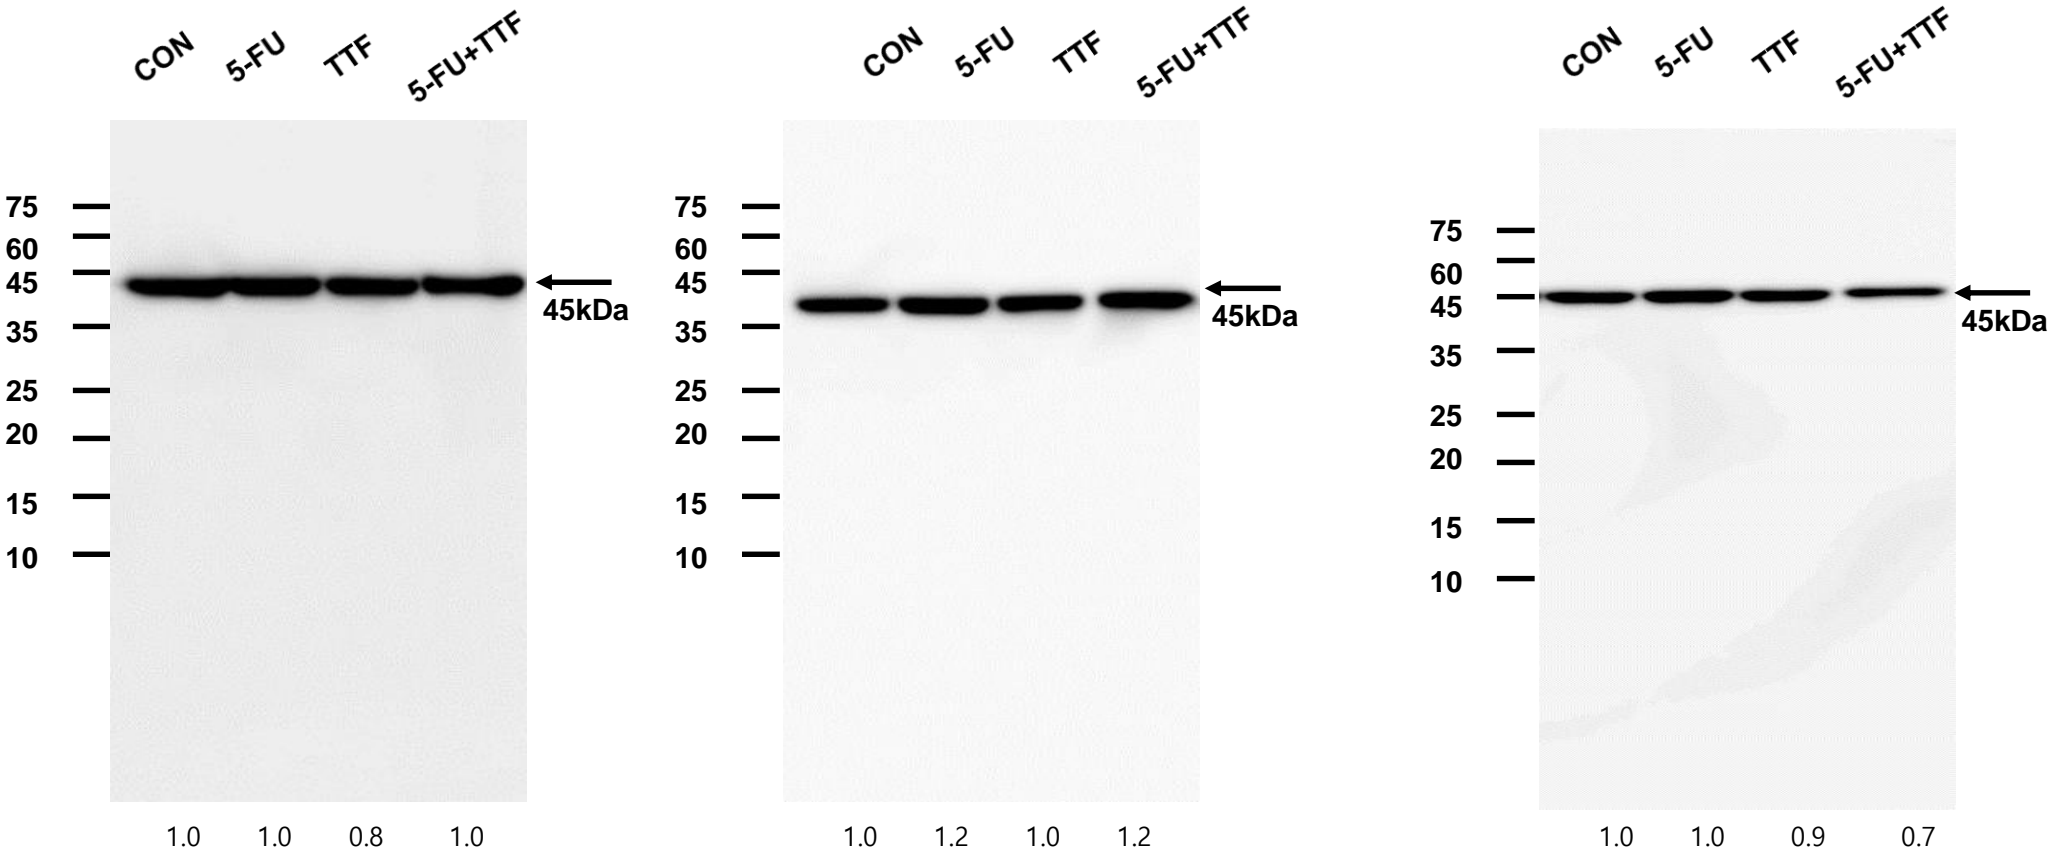

LC3A/B (14,16 kDa)

HCT116

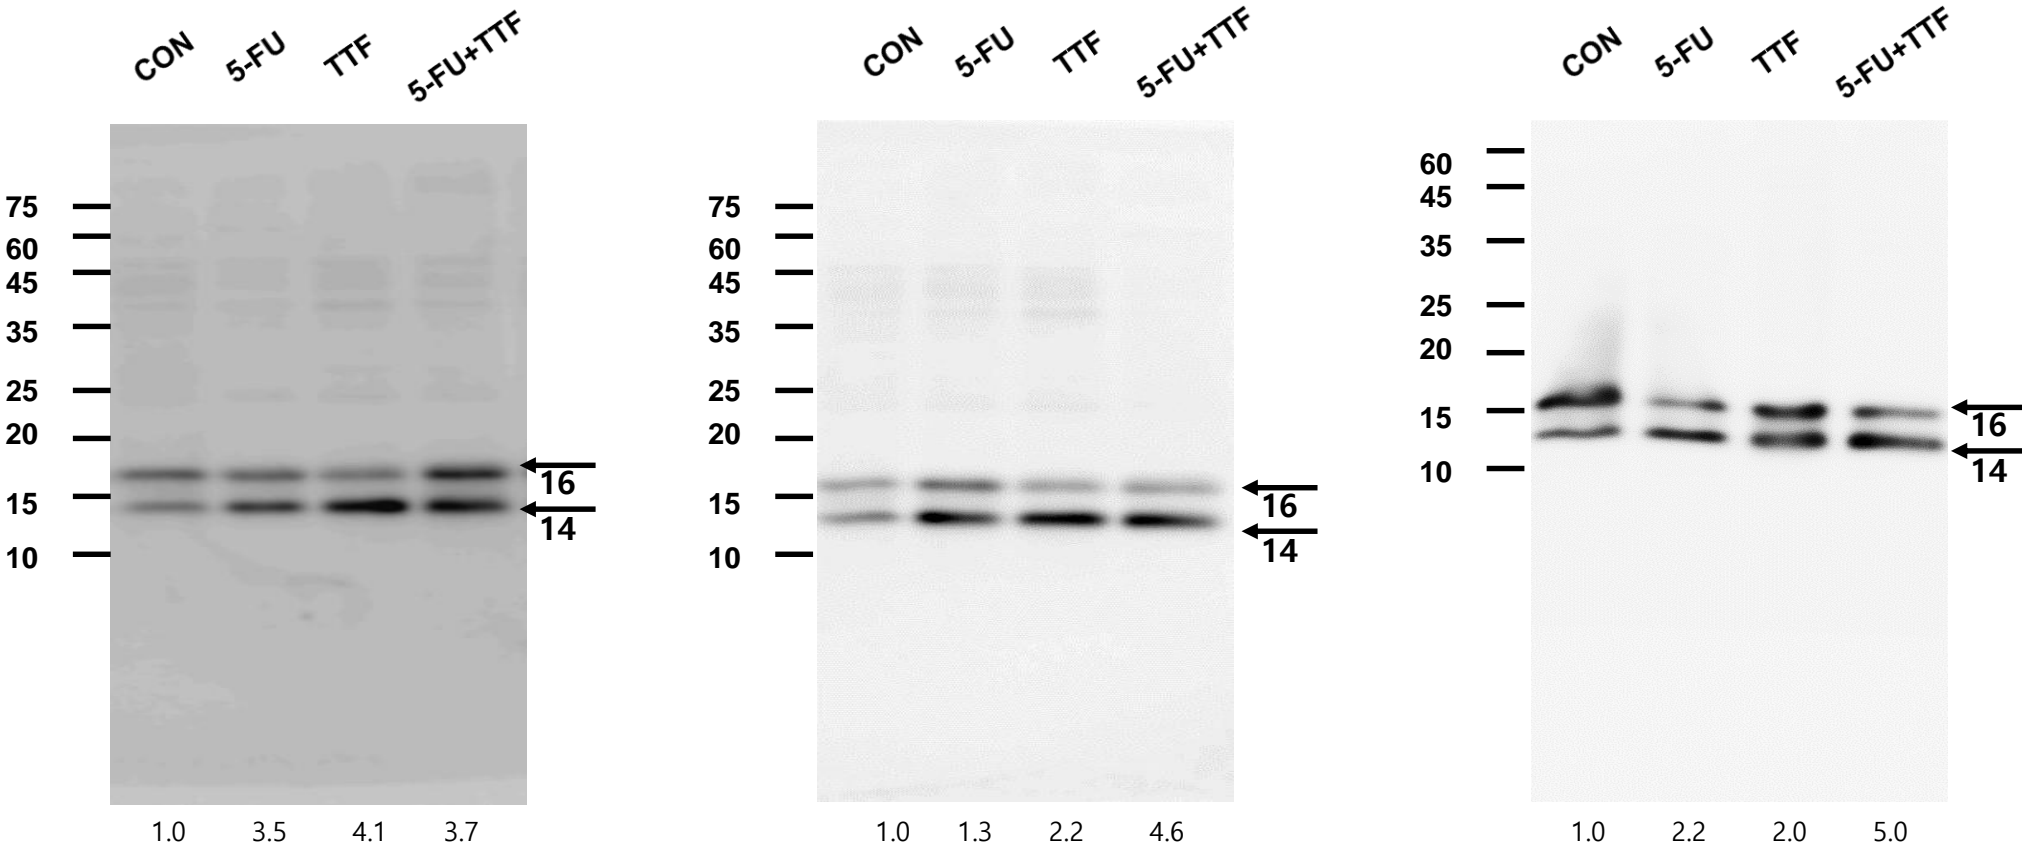

β- actin (45kDa)

HCT116

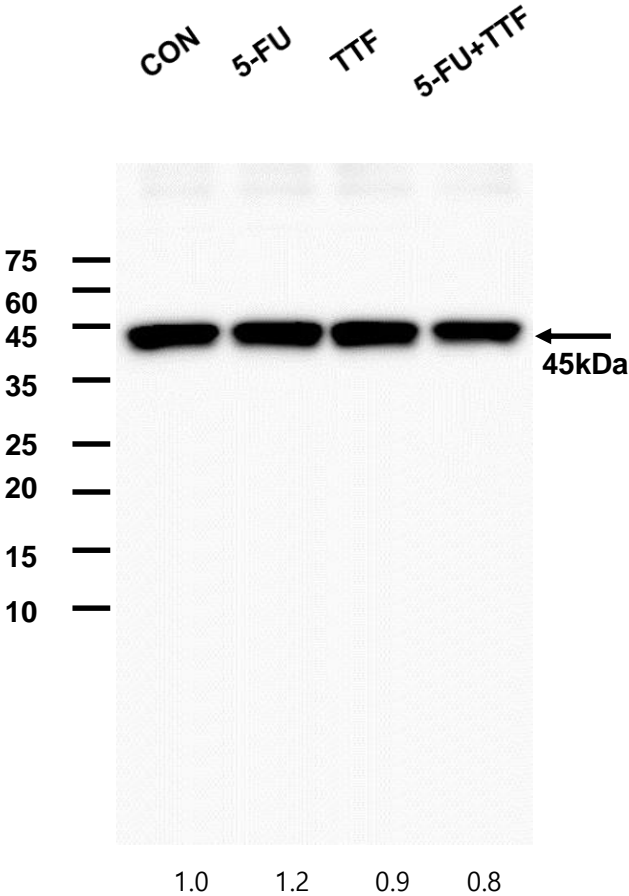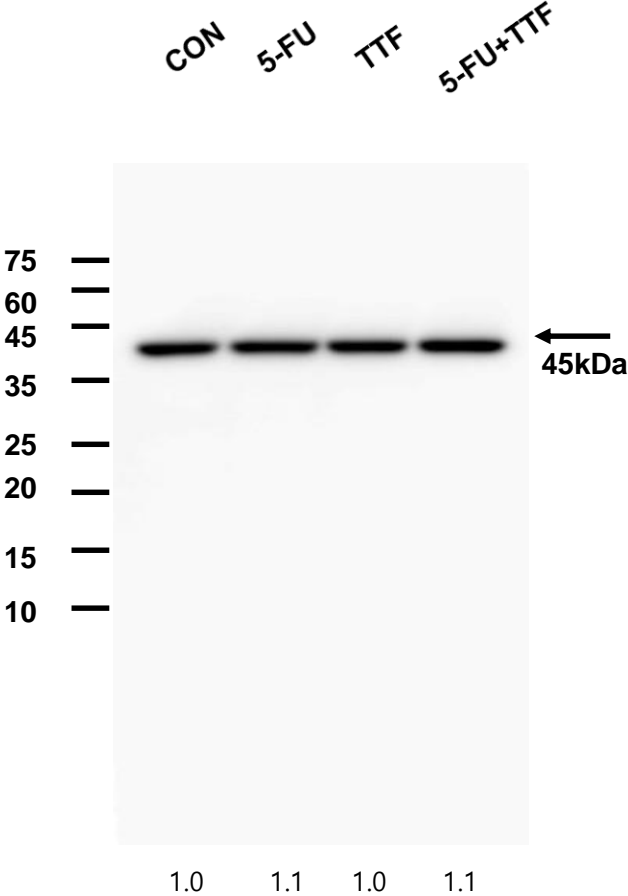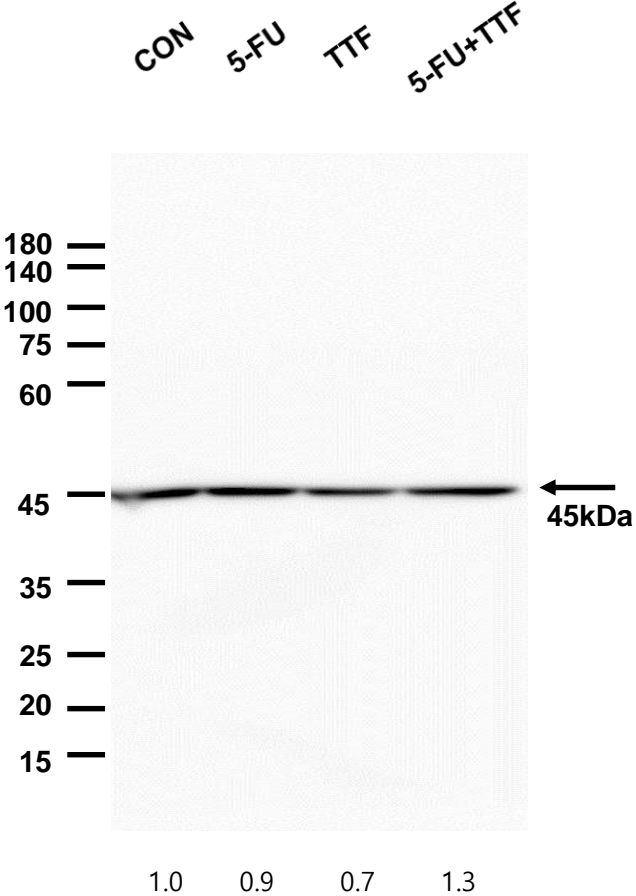

LC3 (16,14 kDa)

SW480

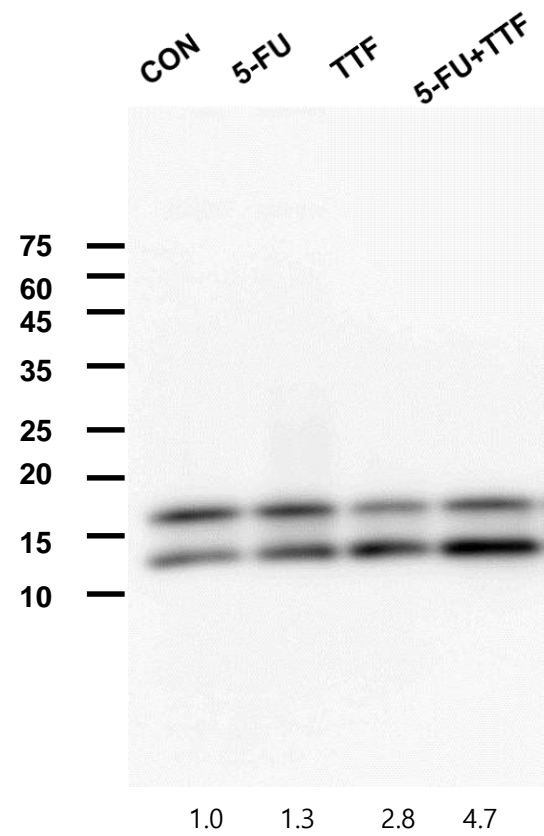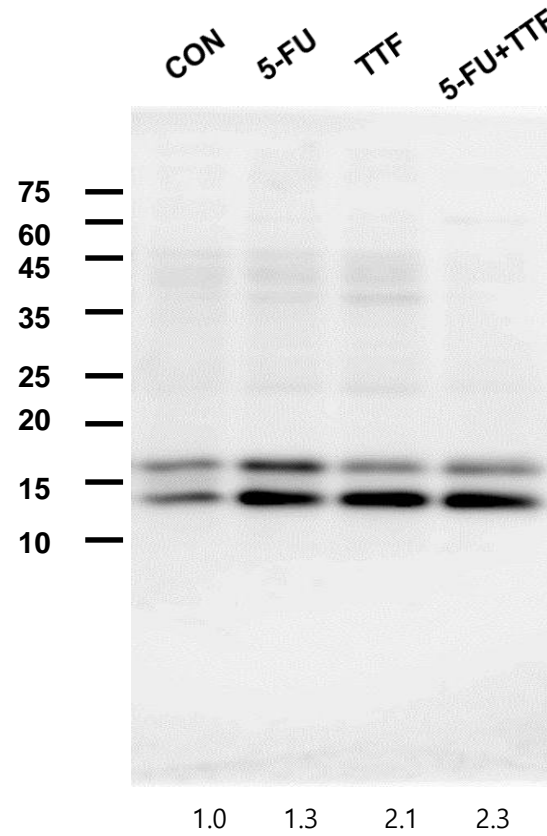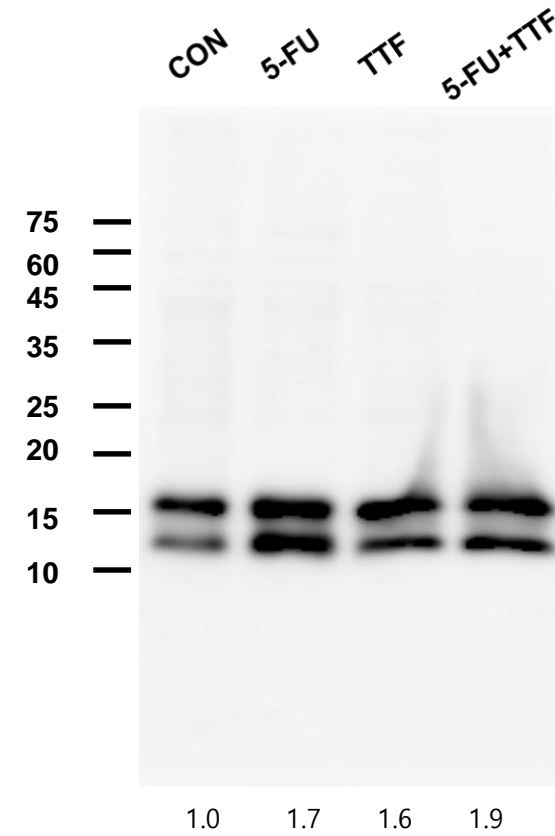



**β- actin (45kDa)**

**SW480**

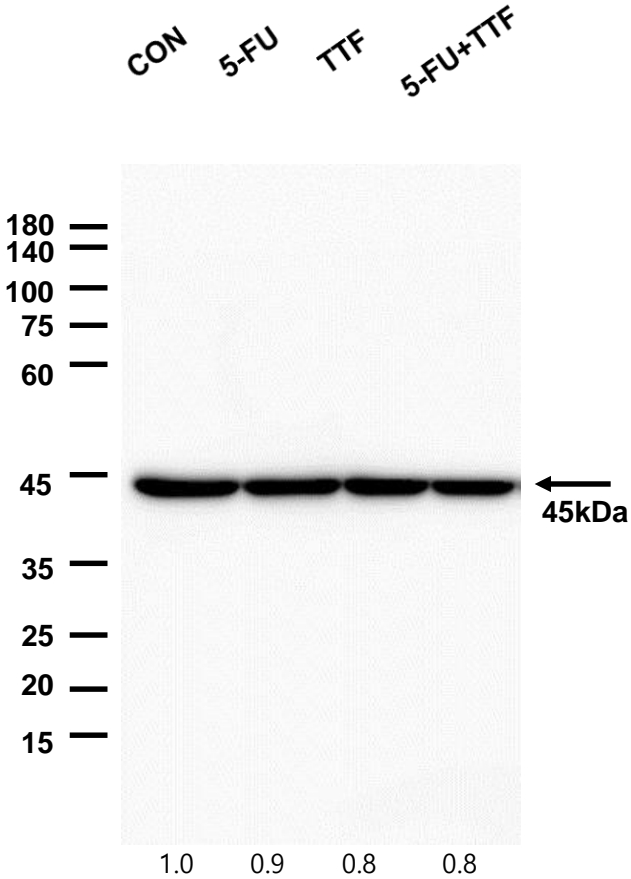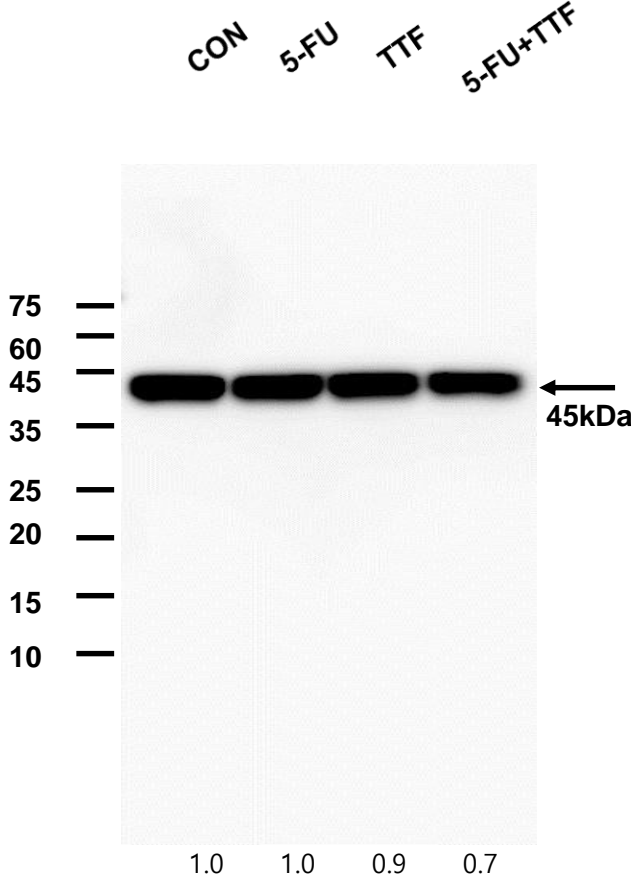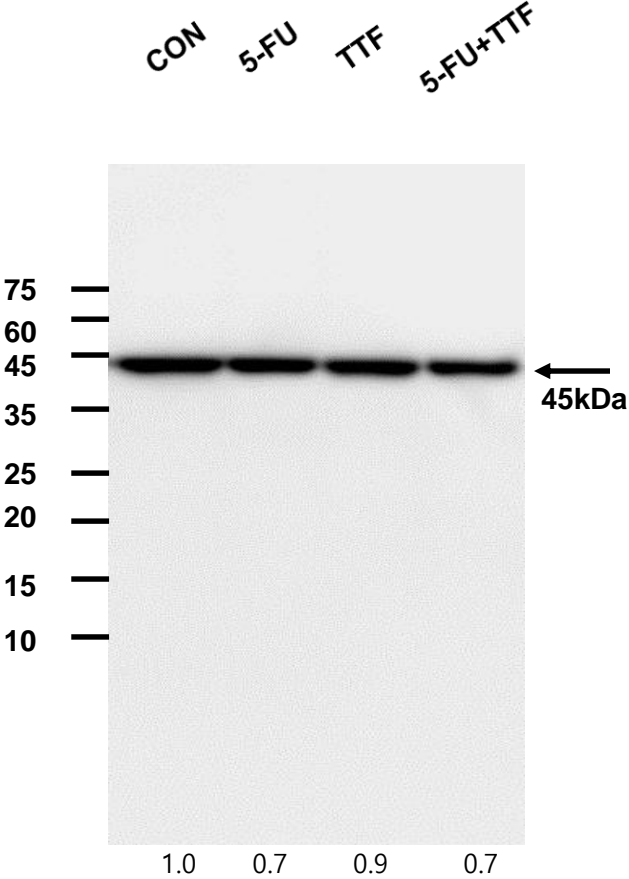

Supplement: s1 [file s1]
